# Supplementary material
Source: publisher figshare collection journal article supplement (https://acs.figshare.com/ndownloader/files/6503913)
Supplement: Supplementary file 1 [file 6503913]

# Supporting Information

“All-Three-in-One”: A New Bismuth-Tellurium-Borate  $\text{Bi}_3\text{TeBO}_9$   
Exhibiting Strong Second Harmonic Generation Response

Mingjun Xia,<sup>†</sup> Xingxing Jiang,<sup>†</sup> Zheshuai Lin<sup>\*,†,‡</sup> and Rukang Li<sup>†,‡</sup>

<sup>†</sup>*Beijing Center for Crystal Research and Development, Key Laboratory of Functional Crystals and Laser Technology, Technical Institute of Physics and Chemistry, Chinese Academy of Sciences, Beijing 100190, China.*

<sup>‡</sup>*University of Chinese Academy of Sciences, Beijing 100049, China.*

## **Contents:**

- 1. Powder X-ray diffraction**
- 2. Single crystal structure determination**
- 3. Thermal analysis**
- 4. UV-VIS-NIR diffuse reflectance spectrum**
- 5. Infrared spectrum**
- 6. SHG Measurement**
- 7. Computational methods**
- 8. Figures**

Figure S1. Infrared spectrum of  $\text{Bi}_3\text{TeBO}_9$ .

Figure S2. The DSC curves of  $\text{Bi}_3\text{TeBO}_9$ .

Figure S3. The XRD patterns of  $\text{Bi}_3\text{TeBO}_9$  before and after melting.

Figure S4. Oscilloscope traces of the SHG signals of KDP and  $\text{Bi}_3\text{TeBO}_9$  at the powder size of 200 – 300  $\mu\text{m}$ .

Figure S5. Electronic band structures along highly symmetrical path in the Brillouin zone for  $\text{Bi}_3\text{TeBO}_9$ .

Figure S6. The partial density of state projected onto constitute atoms in  $\text{Bi}_3\text{TeBO}_9$ .

Figure S7. The UV-VIS-IR reflectance spectrum of  $\text{Bi}_3\text{TeBO}_9$ .

## **9. Tables**

Table S1. Crystal data and structure refinement for  $\text{Bi}_3\text{TeBO}_9$ .

Table S2. Atomic coordinates, equivalent isotropic displacement parameters and bond valence sums for  $\text{Bi}_3\text{TeBO}_9$ .

Table S3. Selected bond lengths and angles for  $\text{Bi}_3\text{TeBO}_9$ .

Table S4. Comparison of the SHG effect among common borate nonlinear optical crystals and  $\text{Bi}_3\text{TeBO}_9$ .

Table S5. Flexibility indices  $F$  of  $\text{CdO}_n$  ( $n=6,7$ ) in  $\text{BiCd}_4\text{O}(\text{BO}_3)_3$  and  $\text{TeO}_6$  in  $\text{A}_3\text{M}_3\text{TeX}_2\text{O}_{14}$  ( $\text{A}=\text{Pb}, \text{Ba}, \text{Sr}$ ,  $\text{M}=\text{Mg}, \text{Zn}$  and  $\text{X}=\text{P}, \text{V}$ ) and  $\text{Bi}_3\text{TeBO}_9$ .

## **10. Discussion**

Discussion S1. Characteristics of the electronic structure in  $\text{Bi}_3\text{TeBO}_9$ .

Discussion S2. Physical mechanism of flexibility index.

## 11. Reference

**1. Powder X-ray diffraction:** The powder X-ray diffraction (PXRD) data were collected on a Bruker D8 Focus diffractometer equipped with Cu K $\alpha$  radiation ( $\lambda = 1.5418 \text{ \AA}$ ) at room temperature in the  $2\theta$  range of  $7 - 70^\circ$ . The Rietveld refinement of PXRD patterns of BTBO samples was conducted to confirm the phase purities using GSAS and EXPGUI software programs.<sup>1, 2</sup>

**2. Single crystal structure determination:** A Bi<sub>3</sub>TeBO<sub>9</sub> crystal with the dimensions of  $0.06 \times 0.05 \times 0.035 \text{ mm}^3$  was chosen for single crystal X-ray diffraction measurement. The crystal data were collected by using graphite-monochromated Mo K $\alpha$  radiation ( $\lambda = 0.71073 \text{ \AA}$ ) on a Bruker APEX II single crystal X-ray diffractometer at room temperature. The structure was solved with direct method by program SHELXS-97 and refined by the full matrix least squares on  $F^2$  by SHELXL-97, respectively.<sup>3</sup> All atoms were refined with anisotropic displacement parameters. The crystal structure was verified by the ADDSYM algorithm using program PLATON<sup>4</sup> and no additional symmetry was given. The crystallographic data and refinement are summarized in Table S1. The atomic coordinates, equivalent displacement parameters and bond valence sums (BVS) are given in Table S2. The selected bond lengths and angles are presented in Table S3.

**3. Thermal analysis:** The differential scanning calorimetric (DSC) analysis was performed on a Labsys<sup>TM</sup> TG – DTA16 (SETARAM) thermal analyzer under nitrogen gas flow. The samples was heated from room temperature to  $900^\circ\text{C}$  at a rate of  $15^\circ\text{C}$  per minute and then cooled to room temperature at the same rate.

**4. UV-VIS-NIR diffuse reflectance spectrum:** The diffuse reflectance spectrum was measured on a Varian Cary 5000 spectrophotometer fitted with an integrating sphere in the wavelength range from 200 nm to 2500 nm with BaSO<sub>4</sub> used as a reference material (100% reflectance). The absorption ( $\alpha/S$ ) spectra were converted from reflectance spectra according to the following Kubelka-Munk function:  $\alpha/S = (1-R)^2/2R$ , where  $\alpha$ ,  $S$  and  $R$  is the absorption, scattering and reflectance coefficient, respectively.<sup>5</sup>

**5. Infrared spectrum:** Infrared (IR) spectroscopy was performed to specify the coordination of boron in BTBO. IR spectra were collected on a Varian Excalibur

3100 spectrometer in the 400 – 4000  $\text{cm}^{-1}$  range. BTBO and dried KBr samples with mass ratio about 1:100 were weighed and mixed thoroughly.

**5. SHG measurement:** The SHG measurements of polycrystalline samples were performed with a Nd: YAG ( $\lambda = 1064 \text{ nm}$ ) as the incident light source.  $\text{Bi}_3\text{TeBO}_9$  samples were ground and sieved into seven distinct size ranges, 20–50, 50–75, 75–100, 100–120, 120–150, 150–200 and 200–300  $\mu\text{m}$  for the test. KDP was served as the reference and sieved into the same size ranges. The SHG signals from samples were detected by a photomultiplier tube.

**6. Computational methods:** The first-principles calculations are performed using CASTEP,<sup>6</sup> a plane-wave pseudopotential total energy package based on density functional theory (DFT).<sup>7</sup> Optimized norm-conserving pseudopotentials<sup>8</sup> in Kleinman-Bylander<sup>9</sup> form are employed to model the electron-ion interactions in  $\text{Bi}_3\text{TeBO}_9$  and allow for the use of a relatively small plane-wave basis set without compromising the accuracy required by this study. The Perdew-Burke-Ernzerhof functionals<sup>10</sup> in generalized gradient approximation (GGA) form<sup>11</sup> is adopted to describe the exchange and correlation energy. A high kinetic energy cutoff of 800eV and dense Monkhorst-Pack<sup>12</sup> k-point meshes spanning less than 0.04  $\text{\AA}^{-1}$  in the Brillouin zones are chosen. Tests show that these computational parameters give results that are sufficiently accurate for present purposes.

Due to the discontinuous nature of the exchange-correlation functional, the GGA-calculated band gap is smaller than the experimental value. Therefore, scissor operator<sup>13</sup> is adopted to raise all the conduction bands to match the calculated band gaps with the measured ones. Based on the scissor-corrected electronic band structure, the imaginary part of the dielectric function can be obtained from the electron transition between the valence band and conduction band.<sup>14</sup> Accordingly, the real part of the dielectric function can be determined using the Kramers-Kronig transform, and the theoretical refractive index ( $n$ ) can be determined. Moreover, the SHG coefficients are calculated using expressions developed by Lin *et al.*<sup>15</sup>

Furthermore, to analyze the contribution of the three groups to the SHG coefficient, SHG-weighted electron density analysis<sup>16</sup> and real-space atom-cutting

technique<sup>15</sup> are employed. In SHG-weighted electron density analysis, the considered SHG coefficient is “resolved” onto each orbital or band, and then the SHG-weighted bands are used to sum the probability densities of all occupied (valence) or unoccupied (conduction) states. This ensures that the quantum states irrelevant to SHG are not shown in the occupied or unoccupied “SHG-densities,” while the orbitals vital to SHG are intuitively highlighted in the real space. In real-space atom-cutting technique, the contribution of ion  $A$ ,  $\chi(A)$ , to the optical coefficients is acquired by excluding all the atoms from the original wave function except  $A$ , *i.e.*,  $\chi(A) = \chi(\text{all atoms excluded except } A)$ .

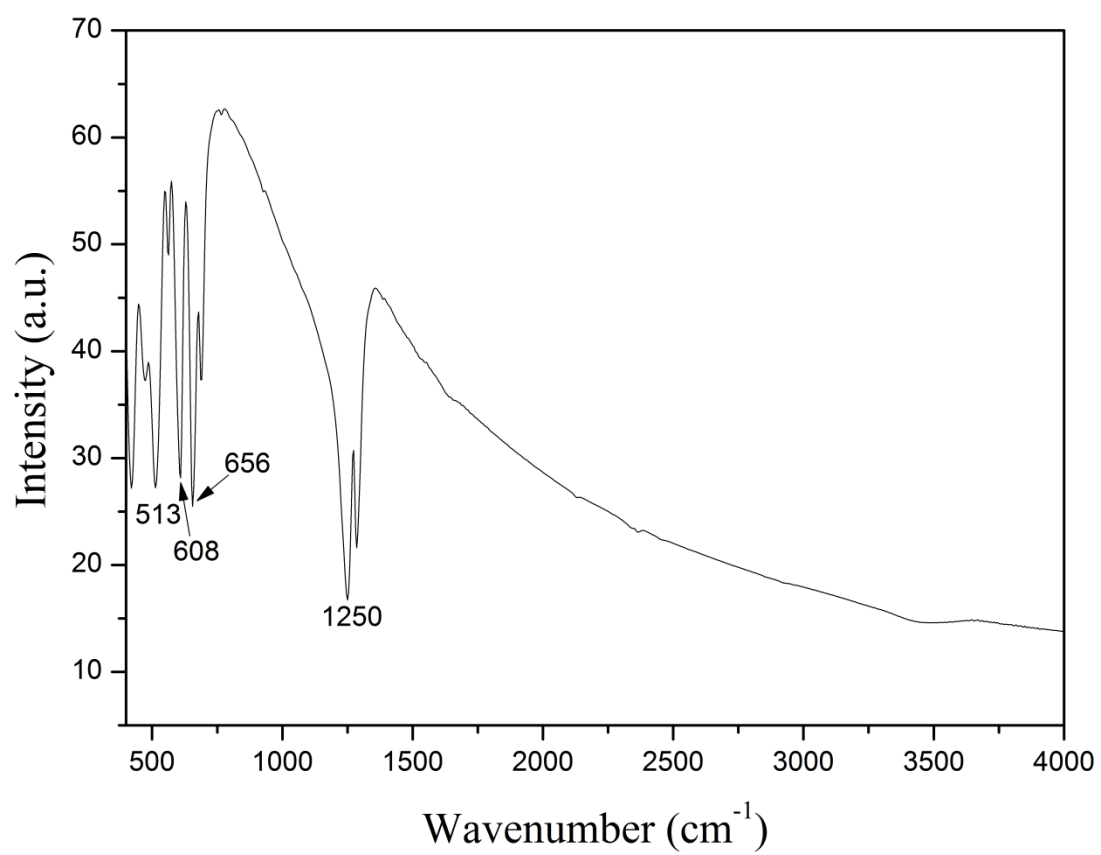

Figure S1. Infrared spectrum of  $\text{Bi}_3\text{TeBO}_9$ .

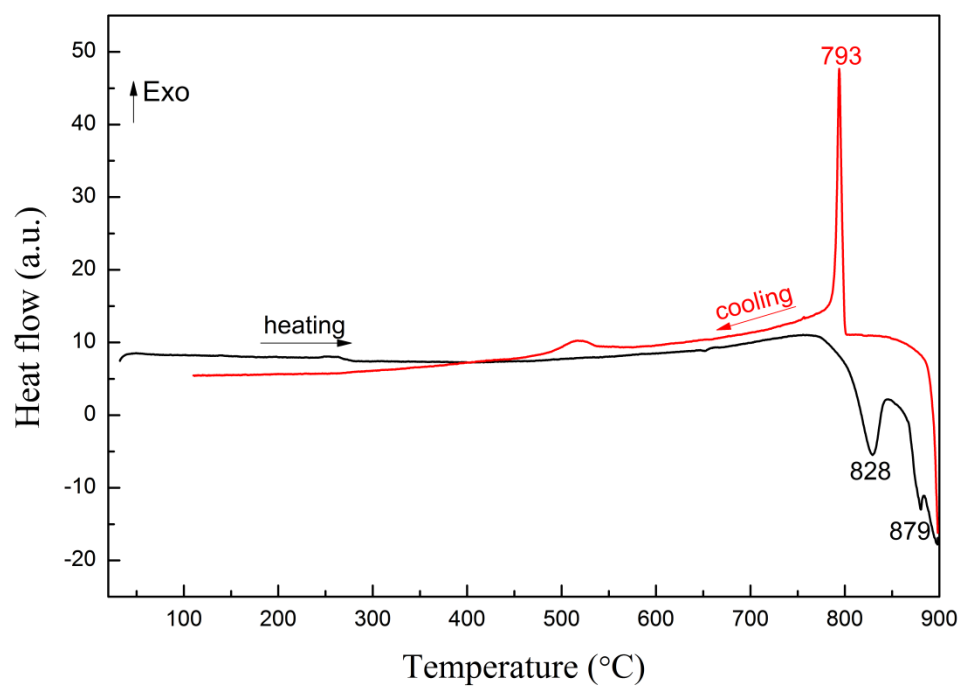

Figure S2. The DSC curves of  $\text{Bi}_3\text{TeBO}_9$ .

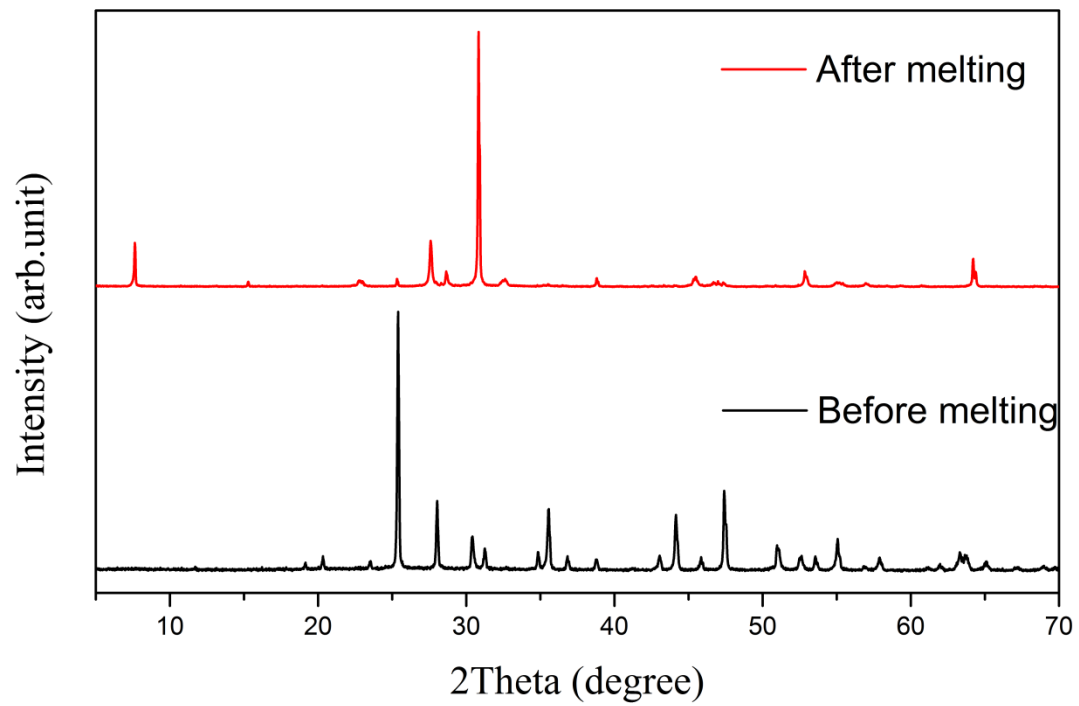

Figure S3. The XRD patterns of  $\text{Bi}_3\text{TeBO}_9$  before and after melting.

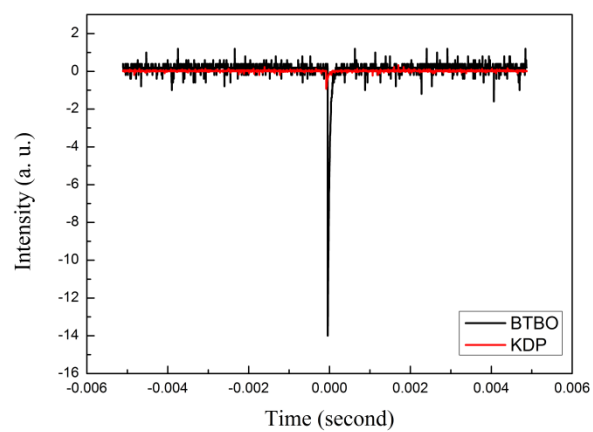

Figure S4. Oscilloscope traces of the SHG signals of KDP and  $\text{Bi}_3\text{TeBO}_9$  at the powder size of 200 – 300  $\mu\text{m}$ .

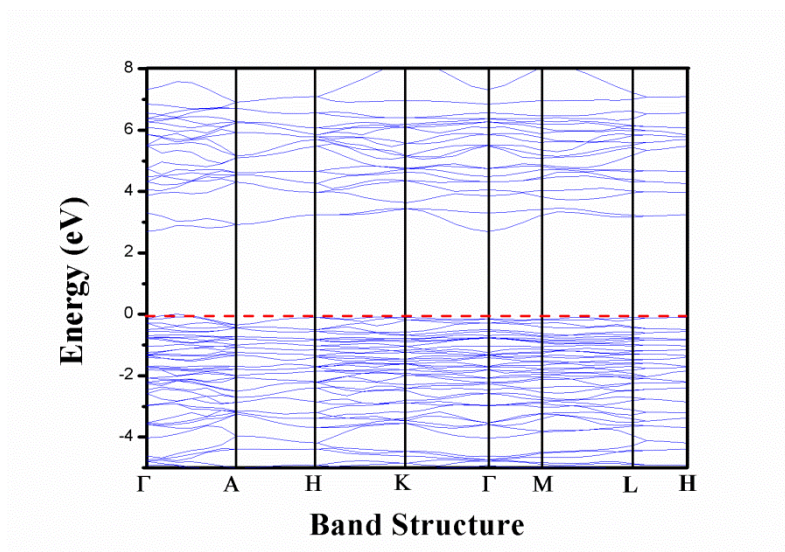

Figure S5. Electronic band structures along highly symmetrical path in the Brillouin zone for  $\text{Bi}_3\text{TeBO}_9$ .

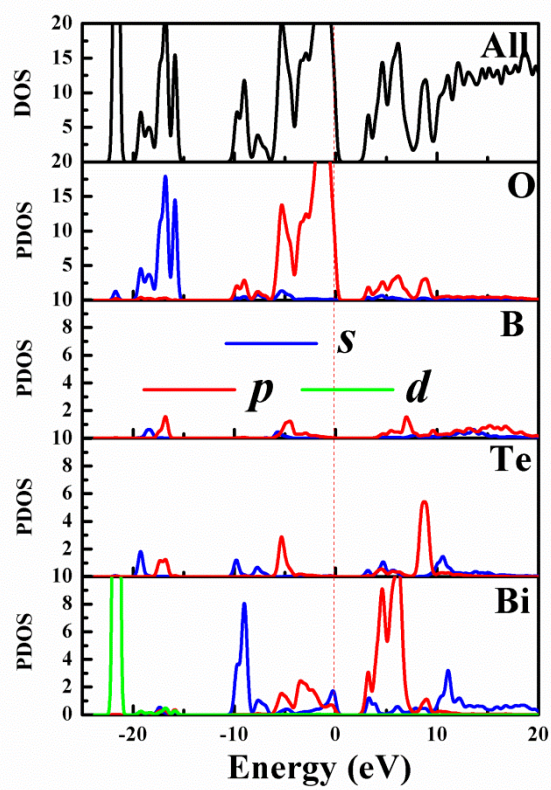

Figure S6. The partial density of state projected onto constitute atoms in  $\text{Bi}_3\text{TeBO}_9$ .

The Characteristics of the electronic structure are shown in Discussion S1.

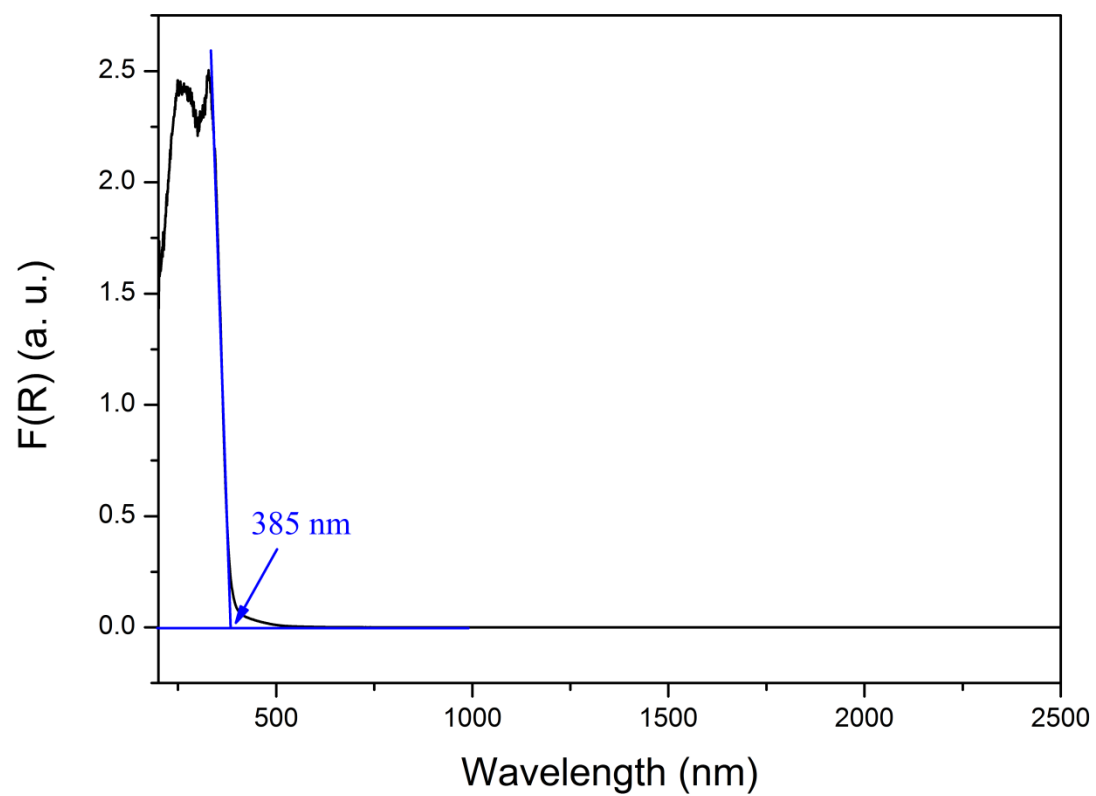

Figure S7. The UV-VIS-IR reflectance spectrum of  $\text{Bi}_3\text{TeBO}_9$ .

Table S1. Crystal data and structure refinement for Bi<sub>3</sub>TeBO<sub>9</sub>.

|                                                                                                                           |                                   |
|---------------------------------------------------------------------------------------------------------------------------|-----------------------------------|
| Formula                                                                                                                   | Bi <sub>3</sub> TeBO <sub>9</sub> |
| Wavelength (Å)                                                                                                            | 0.71073                           |
| Crystal system                                                                                                            | Hexagonal                         |
| Space group                                                                                                               | <i>P</i> 6 <sub>3</sub> (No.173)  |
| a (Å)                                                                                                                     | 8.7510(12)                        |
| c (Å)                                                                                                                     | 5.8981(12)                        |
| Z                                                                                                                         | 2                                 |
| Volume (Å <sup>3</sup> )                                                                                                  | 391.16(11)                        |
| Density (g/cm <sup>3</sup> )                                                                                              | 7.721                             |
| Absorption coefficient (mm <sup>-1</sup> )                                                                                | 70.998                            |
| F(000)                                                                                                                    | 756                               |
| Goodness-of-fit on <i>F</i> <sup>2</sup>                                                                                  | 0.985                             |
| Absolute structure parameter                                                                                              | 0.021(15)                         |
| Final R indices [ <i>I</i> >2σ( <i>I</i> )] <sup>a</sup>                                                                  | R1 = 0.0250, wR2 = 0.0465         |
| R indices (all data) <sup>a</sup>                                                                                         | R1 = 0.0275, wR2 = 0.0469         |
| Extinction coefficient                                                                                                    | 0.0068(3)                         |
| Largest diff. peak and hole (e Å <sup>-3</sup> )                                                                          | 2.101 and -2.696                  |
| <sup>a</sup> R1 = $\sum   F_o  -  F_c   / \sum  F_o $ ; wR2 = $\{\sum [w(F_o^2 - F_c^2)^2] / \sum [w(F_o^2)^2]\}^{1/2}$ . |                                   |

Table S2. Atomic coordinates, equivalent isotropic displacement parameters ( $\text{\AA}^2$ ) and bond valence sums (BVS) for  $\text{Bi}_3\text{TeBO}_9$ .  $U_{\text{eq}}$  is defined as one third of the trace of the orthogonalized  $U_{ij}$  tensor.

| Atom | x          | y          | z           | $U_{\text{eq}}$ | BVS   |
|------|------------|------------|-------------|-----------------|-------|
| Bi1  | 0.29827(3) | 0.34622(3) | 0.10689(12) | 0.00170(9)      | 2.96  |
| Te1  | 2/3        | 1/3        | 0.0813(2)   | 0.0007(2)       | 5.91  |
| O1   | 0.4599(9)  | 0.2464(9)  | 0.2679(12)  | 0.0035(13)      | 2.041 |
| O2   | 0.5407(8)  | 0.4147(8)  | -0.1042(13) | 0.0034(14)      | 1.929 |
| O3   | 0.1009(9)  | 0.1813(8)  | 0.4333(13)  | 0.0032(12)      | 1.941 |
| B1   | 0          | 0          | 0.425(3)    | 0.005(4)        | 2.943 |

Table S3. Selected bond lengths (Å) and angles (deg) for Bi<sub>3</sub>TeBO<sub>9</sub>.

|                       |          |                                        |            |
|-----------------------|----------|----------------------------------------|------------|
| Bi1-O1                | 2.214(7) | Te1-O2 <sup>iv</sup>                   | 1.924(7)   |
| Bi1-O3 <sup>i</sup>   | 2.264(7) | Te1-O2 <sup>v</sup>                    | 1.924(7)   |
| Bi1-O2                | 2.267(7) | Te1-O2                                 | 1.924(7)   |
| Bi1-O1 <sup>ii</sup>  | 2.505(7) | B1-O3                                  | 1.378(6)   |
| Bi1-O3                | 2.506(7) | B1-O3 <sup>vi</sup>                    | 1.378(6)   |
| Bi1-O2 <sup>iii</sup> | 2.514(7) | B1-O3 <sup>vi</sup>                    | 1.378(6)   |
| Te1-O <sup>iv</sup>   | 1.921(7) | O3 <sup>vi</sup> -B1-O3                | 119.88(10) |
| Te1-O1 <sup>v</sup>   | 1.921(7) | O3 <sup>vi</sup> -B1-O3 <sup>vii</sup> | 119.88(10) |
| Te1-O1                | 1.921(7) | O3-B1-O3 <sup>vii</sup>                | 119.88(10) |

Symmetry transformations used to generate equivalent atoms: (i) y,-x+y,z-1/2; (ii) x-y,x,z-1/2; (iii) -x+1,-y+1,z+1/2; (iv) -y+1,x-y,z; (v) -x+y+1,-x+1,z; (vi) -y,x-y,z; (vii) -x+y,-x,z

Table S4. Comparison of the SHG effects among the common borate NLO crystals and Bi<sub>3</sub>TeBO<sub>9</sub>.

| Crystal                                                | Space Group                                     | Powder SHG<br>( $\times$ KDP)      | References |
|--------------------------------------------------------|-------------------------------------------------|------------------------------------|------------|
| LiB <sub>3</sub> O <sub>5</sub> (LBO)                  | <i>Pna2<sub>1</sub></i>                         | 3 ( $d_{32} = 0.85$ pm/V)          | [17]       |
| $\beta$ -BaB <sub>2</sub> O <sub>4</sub> (BBO)         | <i>R3m</i>                                      | 4 ( $d_{22} = 1.6$ pm/V)           | [17]       |
| CsB <sub>3</sub> O <sub>5</sub> (CBO)                  | <i>P2<sub>1</sub>2<sub>1</sub>2<sub>1</sub></i> | 3 ( $d_{14} = 1.04$ pm/V)          | [17]       |
| CsLiB <sub>6</sub> O <sub>10</sub> (CLBO)              | <i>I<math>\bar{4}</math>2d</i>                  | 3 ( $d_{36} = 0.95$ pm/V)          | [17]       |
| KBe <sub>2</sub> BO <sub>3</sub> F <sub>2</sub> (KBBF) | <i>R32</i>                                      | 1.2( $d_{11} = 0.47$ pm/V)         | [17]       |
| YCa <sub>4</sub> O(BO <sub>3</sub> ) <sub>3</sub>      | <i>Cm</i>                                       | 1.5 ( $d_{33} = 1.24$ pm/V*)       | [17]       |
| BiCd <sub>4</sub> O(BO <sub>3</sub> ) <sub>3</sub>     | <i>Cm</i>                                       | 6 ( $d_{11} = 3.21$ pm/V*)         | [18]       |
| BiB <sub>3</sub> O <sub>6</sub> (BIBO)                 | <i>C2</i>                                       | 5 ( $d_{22} = 2.95$ pm/V*)         | [18]       |
| Bi <sub>3</sub> TeBO <sub>9</sub>                      | <i>P6<sub>3</sub></i>                           | $\sim 20$ ( $d_{33} = 5.10$ pm/V*) | This work  |

\*Calculated values

Table S5. Flexibility index  $F$  of  $\text{CdO}_n$  ( $n = 6, 7$ ) in  $\text{BiCd}_4\text{O}(\text{BO}_3)_3$  and  $\text{TeO}_6$  in  $\text{A}_3\text{M}_3\text{TeX}_2\text{O}_{14}$  ( $\text{A} = \text{Pb, Ba, Sr, M} = \text{Mg, Zn}$  and  $\text{X} = \text{P, V}$ )<sup>19</sup> and  $\text{Bi}_3\text{TeBO}_9$ . The SHG coefficients of  $\text{CdO}_n$  or  $\text{TeO}_6$  groups ( $d_{ij}/\text{group}$ ) calculated by the real-space atom-cutting method are also listed for comparison. Clearly, the flexibility indices of  $\text{TeO}_6$  is larger than  $\text{CdO}_n$  polyhedra, in consistent with the results of the atom-cutting calculations. The discussion on the physical mechanism of flexibility index is shown in Discussion S2.

| Crystal                                           | Unit           | $F$   | $d_{ij}/\text{group}^*$ |
|---------------------------------------------------|----------------|-------|-------------------------|
| $\text{BiCd}_4\text{O}(\text{BO}_3)_3$            | $\text{CdO}_6$ | 0.119 | 0.38 pm/V               |
| $\text{BiCd}_4\text{O}(\text{BO}_3)_3$            | $\text{CdO}_7$ | 0.090 | 0.13 pm/V               |
| $\text{Pb}_3\text{Zn}_3\text{TeP}_2\text{O}_{14}$ | $\text{TeO}_6$ | 0.154 | 2.33 pm/V               |
| $\text{Pb}_3\text{Zn}_3\text{TeV}_2\text{O}_{14}$ | $\text{TeO}_6$ | 0.151 | 2.25 pm/V               |
| $\text{Ba}_3\text{Zn}_3\text{TeP}_2\text{O}_{14}$ | $\text{TeO}_6$ | 0.152 | 1.86 pm/V               |
| $\text{Sr}_3\text{Zn}_3\text{TeP}_2\text{O}_{14}$ | $\text{TeO}_6$ | 0.154 | 1.98 pm/V               |
| $\text{Pb}_3\text{Mg}_3\text{TeP}_2\text{O}_{14}$ | $\text{TeO}_6$ | 0.153 | 2.08 pm/V               |
| $\text{Bi}_3\text{TeBO}_9$                        | $\text{TeO}_6$ | 0.152 | 2.17 pm/V               |

\*The values are normalized with respect to the spatial density of  $\text{TeO}_6$  groups in  $\text{Bi}_3\text{TeBO}_9$ .

## Discussion

### Discussion S1. Characteristics of the electronic structure in $\text{Bi}_3\text{TeBO}_9$

The electronic band structure along highly symmetrical path of  $\text{Bi}_3\text{TeBO}_9$  is displayed in Figure S4.  $\text{Bi}_3\text{TeBO}_9$  is typical indirect band gap semiconductor with calculated band gap 2.70 eV, smaller than the experimental value (3.23 eV) by 0.53eV. The partial density of state projected onto constitute atoms is displayed in figure S5, and some characteristic can be deduced:(1) Bi 5*d* orbital is strongly localized the energy states below -20 eV, which is difficult to be stimulated by external light electric field and contribute little to the optical property. Moreover, these orbitals hybridize little with the orbitals of other element, implying that they hardly participate in the formation of chemical bond. (2) The energy level between -20eV and -10eV mainly constitute of Bi 6*s*, Te 5*s* 5*p*, B 2*s* 2*p* and O 2*s* orbitals, the strongly hybridization among these orbitals demonstrate the strong covalent bonds in  $\text{BiO}_6$ ,  $\text{TeO}_6$  and  $\text{BO}_3$  groups. (3) In the top of the valence bands (-10 to 0 eV) and bottom of conduction bands (2.70 to 10 eV), the electron energy states mainly originates from Bi 6*s* 6*p*, Te 5*s* 5*p*, B 2*s* 2*p* and O 2*p* orbitals. The optical property of crystal is dominantly determined by the electron transition across the forbidden, so all the three types group contributes to the SHG coefficient. And especially, the contribution of orbitals in  $\text{BiO}_6$  octahedron is larger than  $\text{TeO}_6$  octahedron and  $\text{BO}_3$  triangle, implying that the contribution to SHG coefficient of former is larger than the latter.

## Discuss S2. Physical mechanism of flexibility index

Flexibility index was proposed to characterize the induced polarizability by valence electrons<sup>20</sup>. It is known that the polarizability is the result of all electrons (including valence electrons and inner electrons) and nucleus. However, the inner electrons are always localized in deep energy level and do not participate in the chemical bond, and their energy states are hardly affected by external photoelectric field. For nucleus the responding spectrum are usually located at middle- or far-IR spectral region (with the wavelength usually larger than 3 $\mu$ m) due to their large mass. Thus, the contribution from nucleus to the polarizability is negligibly small when the alternating photoelectric field is in the near-IR, visible and UV regions. Thus, the induced polarization from valence electrons would have the dominant contribution to the linear and nonlinear optical properties in the near-IR, visible and UV NLO materials. In the 1970s, Levine proposed a “bond charge model”, in which only the contribution of the bond charges (which are mainly constructed by valence electrons) is taken into consideration while that of the inner electrons and nucleus is ignored. Using this model, the good agreement between the calculated and experimental second-order susceptibilities was achieved.<sup>20-22</sup> Moreover, in recent years the plane-wave pseudopotential method based on density functional theory has been successfully applied to theoretically determine the nonlinear susceptibility of materials.<sup>23-26</sup> In this method, the potentials of inner electrons and nucleus are approximated by pseudopotentials, and only the valence electrons are used to obtain the electronic structures, from which the nonlinear optical coefficients are calculated.<sup>15</sup> The success of both methods implies that the nonlinear susceptibility is mainly arise from the polarizability of valence electrons, and the contribution of inner electrons and nucleus is very small and can be ignored. Namely, the “flexibility index” which only considers the contribution of valence electrons is valid for the SHG studies, although some approximations are adopted in this simple model.

The structures of BiCd<sub>4</sub>O(BO<sub>3</sub>)<sub>3</sub> and Bi<sub>3</sub>TeBO<sub>9</sub> both contain the BiO<sub>6</sub> and BO<sub>3</sub> groups. Thus, it is anticipated that in some extends the very different SHG effects in

these two materials would arise from the difference of second-order Jahn-Teller distorted octahedra,  $\text{CdO}_n$  in  $\text{BiCd}_4\text{O}(\text{BO}_3)_3$  and  $\text{TeO}_6$  in  $\text{Bi}_3\text{TeBO}_9$ . The flexibility index calculations reveal that  $\text{TeO}_6$  octahedra are more “flexible” than  $\text{CdO}_n$  polyhedra, indicating that the former groups are easier to generate the larger induced polarization compared with the latter. It is the more “flexible” ability of  $\text{TeO}_6$  groups, combined with their higher spatial density (and higher spatial density of  $\text{BiO}_6$  groups), that makes the SHG response significantly enhanced from  $\text{BiCd}_4\text{O}(\text{BO}_3)_3$  ( $d_{33} = 3.21$  pm/V) to  $\text{Bi}_3\text{TeBO}_9$  ( $d_{33} = 5.10$  pm/V).

## Reference:

- (1) Larson, A. C.; von Dreele, R. B. *General Structure Analysis System*, Los Alamos National Lab, 1994.
- (2) Toby, B. H. *J. Appl. Crystallogr.* **2001**, *34*, 210-213.
- (3) Sheldrick, G. M. *Acta Crystallogr. A* **2008**, *64*, 112.
- (4) Spek, A. L. *J. Appl. Crystallogr.* **2003**, *36*, 7.
- (5) Kubelka, P. Z. *Tech. Phys.* **1931**, *12*, 593
- (6) Clark, S. J.; Segall, M. D.; Pickard, C. J.; Hasnip, P. J.; Probert, M. J.; Refson, K.; Payne, M. C. Z. *Kristallogr.* **2005**, *220*, 567.
- (7) (a) Kohn, W., Sham, L. J. *Phys. Rev.* **1965**, *140*, 1133. (b) Payne, M. C.; Teter, M. P.; Allan, D. C.; Arias, T. A.; Joannopoulos, J. D. *Rev. Mod. Phys.* **1992**, *64*, 1045.
- (8) Rappe, A. M.; Rabe, K. M.; Kaxiras, E.; Joannopoulos, J. D. *Phys. Rev. B.* **1990**, *41*, 1227.
- (9) Kleinman, L.; Bylander, D. M. *Phys. Rev. Lett.* **1982**, *48*, 1425.
- (10) Perdew, J. P.; Burke, K.; Ernzerhof, M. *Phys. Rev. Lett.* **1996**, *77*, 3865.
- (11) Perdew, J. P.; Chevary, J. A.; Vosko, S. H.; Jackson, K. A.; Pederson, M. R.; Singh, D. J.; Fiolhais, C. *Phys. Rev. B.* **1992**, *46*, 6671.
- (12) Monkhorst, H. J.; Pack, J. D. *Phys. Rev. B.* **1976**, *13*, 5188.
- (13) Godby, R. W.; Schluter, M.; Sham, L. J. *Phys. Rev. B.* **1988**, *37*, 10159.
- (14) Palik, E. D. *Handbook of Optical Constants of Solids*, Academic Press, New York **1985**.
- (15) Lin, J.; Lee, M. H.; Liu, Z. P.; Chen, C. T.; Pickard, C. J. *Phys. Rev. B.* **1999**, *60*, 13380.
- (16) Lee, M. H.; Yang, C. H.; Jan, J. H. *Phys. Rev. B.* **2004**, *70*, 235110.
- (17) Chen, C. T.; Sasaki, T.; Li, R. K.; Wu, Y. C.; Lin, Z. S.; Mori, Y.; Hu, Z. G.; Wang, J. Y.; Uda, S.; Yoshimura, M.; Kaneda, Y. *Nonlinear Optical Borate Crystals: Principles and Applications*. Wiley-VCH, **2012**.
- (18) Zhang, W. L.; Cheng, W. D.; Zhang, H.; Geng, L.; Lin, C. S.; He, Z. Z. *J. Am. Chem. Soc.* **2010**, *132*, 1508.
- (19) (a) Yu, H. W.; Zhang, W. G.; Young, J.; Rondinelli, J. M.; Halasyamani, P. S. *J. Am. Chem. Soc.* **2016**, *138*, 88. (b) Yu, H. W.; Young, I.; Wu, H. P.; Zhang, W. G.; Rondinelli, J. M.; Halasyamani, P. S. *J. Am. Chem. Soc.* **2016**, *138*, 4984.

- (20) Levine. B. F. *Phys. Rev. Lett.* 1969, **22**, 787.
- (21) Levine. B. F. *Phys. Rev. Lett.* 1970, **25**, 440.
- (22) Levine. B. F. *Phys. Rev. B* 1973, **7**, 2600.
- (23) Lin, Z. S.; Jiang, X. X.; Kang, L.; Gong, P. F.; Luo, S. Y.; Lee, M. H. *J. Phys. D: Appl. Phys.* **2014**, *47*, 253001.
- (24) Zhao, S. G.; Gong, P. F.; Luo, S. Y.; Bai, L.; Lin, Z. S.; Ji, C. M.; Chen, T. L.; Hong, M. C.; Luo, J. H.; *J. Am. Chem. Soc.* **2014**, *136*, 8560.
- (25) Kang, L.; Zhou, M. L.; Yao, J. Y.; Lin, Z. S.; Wu, Y. C.; Chen, C. T. *J. Am. Chem. Soc.* **2015**, *137*, 13049.
- (26) Zhang, M.; Su, X.; Pan, S. L.; Wang, Z.; Zhang, H.; Yang, Z. H.; Zhang, B. B.; Dong, L. Y.; Wang, Y.; Zhang, F. F.; Yang, Y. *J. Phys. Chem. C* **2014**, *118*, 11849.
- (27) Jiang, X. X.; Zhao, S. G.; Lin, Z. S.; Luo, J. H.; Bristowe, P. D.; Guan, X. G.; Chen, C. T. *J. Mater. Chem. C* **2014**, *2*, 530.
